1  
2  
3  
4  
5  
6  
7  
8  
9  
10  
11  
12  
13  
14  
15  
16  
17  
18  
19  
20  
21  
22  
23  
24

# Simple fence modification increases floodplain land movement prospects for freshwater turtles

Nathan J. Waltham<sup>1\*</sup>, Jason Schaffer<sup>1</sup>, Justin Perry<sup>3</sup>, Sophie Walker<sup>2</sup>, Eric Nordberg<sup>2,3</sup>

<sup>1</sup>Centre for Tropical Water and Aquatic Ecosystem Research (TropWATER),  
Freshwater Ecology Research Group, College of Science and Engineering, James Cook  
University, Queensland, 4811, Australia.

<sup>2</sup>College of Science and Engineering, James Cook University, Australia.

<sup>3</sup>CSIRO Land and Water, Townsville, QLD 4811, Australia

\*Corresponding Author Tel + 61 7 4781 4191; fax + 61 7 4781 5589

E-mail address: [nathan.waltham@jcu.edu.au](mailto:nathan.waltham@jcu.edu.au)

Keywords: connectivity, exclusion fences, feral pigs, freshwater turtles, floodplains, wetlands

Running header: Simple fence modification increases freshwater turtle movement

25 **Abstract**

26 Feral pigs predate on freshwater turtles and damage wetland habitats in the process. Installing  
27 fences successfully averts access and damage, however, they become a barrier for freshwater  
28 turtles requiring land access during migration. We collected 161 turtles (*Chelodina rugosa*,  
29 *Emydura subglobosa worrelli*, *Myuchelys latisternum*) from twenty floodplain and riverine  
30 wetlands during post-wet (June-August) and late-dry season (November-December) surveys  
31 (2015-2018) in northern Australia. Wetlands were either fenced (150 x 150mm square, 1.05m  
32 high wire mesh) or not around the wet perimeter. Nine-seven percent of individuals caught in  
33 either fenced or unfenced wetlands had a shell carapace width greater than mesh width, of  
34 these 44 (46%) were captured inside fenced wetlands, while 50 were caught in unfenced  
35 wetlands. The remaining 35 were smaller than 150mm and would easily pass through fence  
36 mesh. Sixty-five turtles partook in a fencing manipulative experiment. Turtles with carapace  
37 widths wider than mesh often successfully escaped through fences by lifting one side of their  
38 shell and passing diagonally. In a second experiment where a piece of vertical wire  
39 (1500mmx300mm) was removed, turtles located gates after prospecting and trying to fit  
40 through meshing areas that were too small to pass through. Nine-two percent of turtles were  
41 able to locate and pass through gates, while 8% failed to locate a gate after 2 hours. Three  
42 turtles that did not use gates, and seemed to ‘give up’ and dug into the grass. Gates applied  
43 every 4m showed an 83% passage rate, every 2m was 91%, and while every 1m was 100%.  
44 Combing field and manipulative experiments revealed that large turtles will prospect and move  
45 along a fence until they find suitable passage. Applying turtle gates every 1–4m allows almost  
46 100% passage, and if strategically applied in travel corridors, would minimize the need for  
47 large-scale clipping efforts around entire wetlands.

## 48 **1. Introduction**

49 Conservation fences are a way to ameliorate threatening processes from acting against  
50 individual species or for conservation of sensitive ecosystem habitats [1]. While conservation  
51 fences have been successful [2], they also have negative indirect effects on non-target species  
52 [3, 4], resulting in an ongoing conservation dilemma for managers [5, 6]. Emerging evidence  
53 suggests that fencing affects non-target species, for example, by disruption to dispersal  
54 processes, and increased mortality (via increased exposure to unfavourable conditions or  
55 predators; Spencer (7)). These impacts are greatest on vagile animals which have evolved  
56 behavioral life history traits that allow them to inhabit landscapes characterized by spatial and  
57 temporal variability, and are therefore susceptible to limited access to resources or responding  
58 to local pressures (predation, climate conditions). However, with every conservation fence  
59 there exists the opportunity to evaluate the design efficacy, and implement supplementary  
60 modifications and improvements as part of a process of continual improvement [3].

61  
62 Wetlands (palustrine and lacustrine) located on floodplains away from riverine channels  
63 support rich aquatic plant and fauna communities [8]. During high water levels in flood,  
64 interconnecting riverine channels create a linking network of waterbodies that persist  
65 permanently or only in an ephemeral state [9, 10]. Aquatic organisms occupying wetlands face  
66 a shifting land-water margin, until connection is finally broken. This results in wetlands  
67 supporting a non-random assortment of aquatic and semi-aquatic species [11, 12]. The  
68 duration, timing and frequency that off-channel wetlands sustain lateral connection to primary  
69 rivers is a determining factor in broader aquatic ecology and production [13, 14]. In addition to  
70 connection, environmental conditions become important including water quality [15-17],  
71 access to shelter to escape predation, and available food resources [18]. Managers are  
72 increasing efforts to restore wetland ecosystem values [19], though access to data

73 demonstrating success are limited, which becomes important when attempting to assess  
74 biodiversity return for the funding invested by government or private sector markets [20, 21].

75  
76 Across northern Australia, feral pigs (*Sus scrofa*) contribute wide-scale negative impact on  
77 wetland vegetation assemblages, water quality, biological communities and wider ecological  
78 processes [22, 23]. Feral pigs have an omnivorous diet supported by plant roots, bulbs and  
79 other below-ground vegetation throughout terrestrial and wetland areas [24]. This feeding  
80 strategy has a direct negative impact on wetland aquatic vegetation [25, 26], which gives rise to  
81 soil erosion, benthic sediment resuspension, and reduced water clarity and eutrophication  
82 which is particularly critical late-dry season. Only a few studies have quantified the negative  
83 impacts feral pigs have on coastal wetlands [26-29], limiting the ability of land managers to  
84 measure the benefits of feral pig destruction [30], or indeed other large invasive species [31].  
85 Strategies focused on reducing or removing feral pigs from the landscape have been employed  
86 since their introduction to Australia [30], including poison baiting, aerial shooting, and  
87 trapping using specially constructed mesh cages [32]. Attempts to exclude feral pigs have also  
88 included building exclusion fencing for conservation outcomes by directly limiting access to  
89 essential resources [33]. The installation of fences around wetlands has only recently been  
90 examined in Australia [26, 27], with results suggesting that fences may prevent non-target  
91 terrestrial fauna access which becomes particularly relevant late-dry season when wetlands are  
92 regional water points in the landscape. While small terrestrial species including birds, snakes  
93 and lizards can still access fenced wetlands [32], freshwater turtles movement may be  
94 hindered. To this end, the inherent problem of wildlife fencing needs further consideration [6]  
95 as part of broader wildlife conservation and resource management strategies.

96  
97 Globally, freshwater turtles are at risk of extinction due to landscape changes including poor  
98 habitat quality, fragmentation or total habitat loss [23, 34], nest predation [7, 35], or changes in

99 hydrology either through direct water extraction or regulation [36], and climate change [37]. In  
100 northern Australia, a number of freshwater turtle species inhabit seasonal wetland complexes  
101 [38] and will employ terrestrial locomotion to exploit ephemeral food supplies, to lay eggs or  
102 escape drought. Accessing terrestrial areas expose turtles to new hazards such as desiccation,  
103 and predation by other terrestrial fauna [39, 40]. Freshwater turtles hold important cultural  
104 values, which has led to funding feral control programs to install fences to protect turtles. The  
105 use of wetland perimeter fencing is now widespread in northern Australia, which has improved  
106 protection of aquatic vegetation and water quality [26]. However, fencing does still pose  
107 concerns relating to whether turtle movement is impeded.

108  
109 As part of a broader feral pig abatement partnership between government, indigenous  
110 community, and research agencies [32], our aim here was to evaluate the potential effect that  
111 wetland exclusion fencing has on the population demographics of freshwater turtle species  
112 inhabiting floodplain and riverine wetland complexes in northern Australia. Specifically, we  
113 examined shell morphology in relation to fence dimension characteristics from turtle  
114 populations captured in fenced and unfenced wetlands to determine the proportion of  
115 individuals whose mobility across the landscape would be restricted because of fencing.

116 Extending on the field observations and previous studies which have shown that turtles will  
117 persist in their attempts to overcome barriers to movement between wetlands [5], we tested  
118 simple ‘turtle gates’ on a commonly used exclusion fence to increase services provided by  
119 wetlands and mitigation efforts.

120

## 121 **2. Methods**

### 122 **2.1 Description of study system**

123 We studied freshwater turtles occupying floodplain and riverine wetlands between 2015 and  
124 2018 within the Archer River catchment, Cape York Peninsula, Queensland (Figure 1). The  
125 headwaters rise in the McIlwraith range on the eastern side Cape York, where it flows and  
126 enters the western side of the Gulf of Carpentaria. The catchment area is 13,820km<sup>2</sup>, which  
127 includes approximately 4% (510km<sup>2</sup>) of wetland habitats, including estuarine mangroves, salt  
128 flats and saltmarshes, wet heath swamps, floodplain grass sedge, herb and tree *Melaleuca* spp.  
129 swamps, and riverine habitat. The lower catchment includes part of the Directory of  
130 Internationally Important Wetland network (i.e., nationally recognised status for conservation  
131 and cultural value) that extends along much of the eastern Gulf of Carpentaria, including the  
132 Archer Bay Aggregation, Northeast Karumba Plain Aggregation and Northern Holroyd Plain  
133 Aggregation. Two national parks are located within the catchment (KULLA (McIlwraith  
134 Range) National Park, and Oyala Thumotang National Park). Land use is predominately  
135 grazing.

136  
137 Rainfall is tropical monsoonal, strongly seasonal with 90% of total annual rain occurring  
138 between November and February. Long term rainfall records for the catchment revealed  
139 highest wet season rainfall occurred in 1989/1999 (2515mm), while the lowest was 1960/1961  
140 (563.5mm). Total antecedent rainfall for the wet season prior (Nov 2014 to Feb 2015) to this  
141 research was 1081mm, close to the 10<sup>th</sup> percentile for historical records. The wet seasons  
142 experienced through the years prior to this study (2010 to 2015) were among the wettest on  
143 record, proximal to the 95<sup>th</sup> percentile. The low rainfall experienced during this study may have  
144 contributed to short flood duration, and connection between wetlands and the Archer River.

145  
146 Twenty wetlands were sampled including both floodplain and riverine wetlands that were not  
147 on the main flow channels, but rather on anabranches and flood channels that connect to the  
148 main channels only during high flow events (Waltham & Schaffer, in review). All wetlands in

149 the region have been damaged by pigs (and cattle to a lesser extent) for the past 160 years [41,  
150 42]. However, recently local indigenous community groups commenced a program of fencing  
151 wetlands to abate feral pig and cattle from accessing wetlands, in accordance with indigenous  
152 groups Kalan Enterprises, Aak Puul Ngangtam, and partners to meet the objectives of  
153 traditional owners [32].

154

## 155 **2.2 Field methods – fenced and unfenced wetlands**

156 Freshwater turtles were captured using specialized circular (820mm×2500mm) collapsible  
157 ‘cathedral-style’ traps [43] baited with canned sardines in vegetable oil. Generally, two traps  
158 were deployed in ~1.5m of water, spaced ~150m apart, mid-to-late afternoon (1500–1700hrs)  
159 and checked between 1000 and 1200hrs the following day. In some wetlands and at certain  
160 times of the year, low water levels rendered cathedral traps impractical. In these instances,  
161 turtles were passively sampled with unbaited fyke nets (1mm mesh, 0.5m height, single wing  
162 panel span 10m) set along the wetland margins. All traps were open and undisturbed overnight.  
163 Captured turtles were weighed, measured (following the morphometric codes in Table S1) and  
164 released back at the site of capture. In addition to trapping, the perimeters of fenced wetlands  
165 were searched for evidence of turtles either alive or dead trying to pilot through fences. If  
166 found, the morphometric data of turtles were recorded and added to the dataset.

167

## 168 **2.3 Fencing manipulative experiment**

### 169 *Experiment 1 – fence mesh sizes*

170 Four replicated field arenas were constructed on a flat grassy bank adjacent to a wetland lagoon  
171 near Townsville, Queensland (Figure 1D). Each arena (4x6x1m [LxWxH]) was constructed  
172 using 180cm star pickets to which we attached galvanized fencing (Southern Wire Griplock®  
173 80/90/15) identical to that used in feral pig management in the Archer River catchment. Fences  
174 were 90cm high and composed of 2.50mm wire with a standard 150mm gap between vertical

175 strands. Eight horizontal strands of wire create 7 mesh panels which are arrayed in a vertically  
176 increasing graduated mesh design (mesh area [LxWmm] ‘large’ =  $2316 \pm 81\text{cm}^3$ ; ‘small’ =  
177  $1540 \pm 46\text{cm}^3$ ) (Table S2). Generally, the smaller mesh size is used at the bottom of the fence to  
178 reinforce against the prospect of pigs digging under fences [32]. We tested the passage rates of  
179 turtles through these fences oriented with both the small (normal) and large (up-side-down)  
180 mesh panels at the bottom.

181  
182 Sixty-five turtles (*Emydura macquarii krefftii*) were captured from waterbodies in close  
183 proximity to the experimental arenas. For every replicate in each trial, one individual was  
184 placed in the centre of the test arena underneath an upturned 70L nally bin for 10min to  
185 acclimate before being lifted for the trial to begin. To minimize disturbance, turtles were  
186 monitored via BluTooth GoPro video cameras attached and mounted to a suspended cross-beam  
187 overhanging each arena. Turtles were observed for up to 120mins to see if they could escape,  
188 after which the experiment ceased. After each trial, all turtles (including those that had escaped  
189 arenas) were kept in shaded, storage containers and released at the end of each day at the point  
190 of capture.

191

### 192 *Experiment 2 – manipulated ‘gate’*

193 We designed a second experiment to test whether turtles could locate ‘turtle gates’ if they  
194 could not fit through the standard pig meshing. All field arenas were set up with the small  
195 mesh on the bottom, as would be typical for a feral pig arena fence. An additional section of  
196 wire was weaved through the bottom row of wire meshing to ensure that turtles (44 *Emydura*  
197 *macquarii krefftii*, and one *Myuchelys latisternum*) would not be able to pass through the fence  
198 without using the turtle gates (ensuring turtles were blocked in arenas – see Figure 1E). This  
199 permitted the use of a wide range in body sizes (even those that would normally be able to pass  
200 through the small meshing). Turtles were placed into arenas (described above) with ‘turtle



201 gates' clipped into the bottom row of the fence. We examined if and how long it took turtles to  
202 locate and successfully pass through gates using three distinct treatments: field arenas with  
203 gates every 1, 2 and 4m along the base. Each arena received the same gate spacing around the  
204 entire perimeter. The time it took turtles from release to exit through a gate after encountering a  
205 fence, and how far turtles travelled along the fence before existing the arena through a gate  
206 were recorded.

207

## 208 **2.4 Data analysis**

209 To examine whether turtle morphometrics differed between the Archer River floodplain (lower  
210 wetlands) to those captured in the upper catchment (upper wetlands), we used using  
211 multidimensional scaling ordinations, based on the Bray-Curtis similarities measure [44] with  
212 significance determined from 10,000 permutations. Multivariate dispersion were tested using  
213 PERMDISP, however, homogeneity of variance could not be stabilized with transformation,  
214 and therefore untransformed data were used. Multivariate differences using PERMANOVA  
215 [45] were tested using two factors: lower/upper wetlands (fixed), and fenced/unfenced (fixed).

216

## 217 **3. Results**

### 218 **3.1 Archer River wetland field results**

219 A total of 161 turtles were captured during this study, representing four species including *E. s.*  
220 *worrelli* (n=96), *Chelodina rugosa* (n=54), *M. latisternum* (n=6) and *C. canni* (n=5) (Table  
221 S3). There were 79 females, 63 males, 14 juveniles and 1 sub-adult captured (with four where  
222 sex could not be resolved). In addition, three individuals were identified from in situ shell  
223 material found adjacent to wetlands in both the upper and lower catchment. One *C. canni* and  
224 one *E. s. worrelli* were identified from in situ shell material found in the interior (not along the  
225 inside of the fence) of a fenced wetland in the upper catchment and one freshly pig predated, *C.*

226 *rugosa* individual was found immediately adjacent to its aestivation site in an unfenced  
227 wetland located in the lower catchment.

228  
229 The largest turtle captured was a female *C. rugosa* on the lower catchment floodplain, in an  
230 unfenced wetland (354.9mm SCL, 245.9mm SCW, 6.7kg wet weight), while the smallest was  
231 an *E. s. worrelli* in a fenced wetland in the upper catchment (95mm SCL, 87.5mm SCW, 110g  
232 wet weight). The average SCW (mean±SD) for each species was: *E. s. worrelli*  
233 (147.7±32.1mm, n=96)), followed by *C. rugosa* (160.7±33.5mm, n=54), *M. latisternum*  
234 (150.3±29.3mm, n=6), and *C. canni* (146.8±30.1mm, n=5).

235  
236 There was an interaction between fencing/non fencing and wetland region in the catchment  
237 owing to a difference in the morphometrics for turtles between the lower and upper catchment  
238 wetland sites (PERMANOVA, interaction, Pseudo-F=5.81,  $P=0.02$ ; Figure 2). However, some  
239 individuals from the unfenced lower catchment had turtles more similar to upper catchment  
240 fenced wetlands. Overall, turtles on the lower catchment floodplain were larger (including  
241 body weight) compared to those captured in the upper catchment.

242  
243 Pooling *C. rugosa*, *E. s. worrelli* and *M. latisternum* (161, 97% of total catch), 94 individuals  
244 caught in either fenced or unfenced wetlands that had a SCW greater than 150mm, and would  
245 likely not be able to negotiate exclusion fences. (It is possible that with the diagonal width of  
246 mesh approximately 180mm; Table S2, turtles with a SCW slightly greater than 150mm might  
247 squeeze through fence mesh though we could not confirm this at the time of field sampling and  
248 instead apply 150mm SCW to turtles – though see manipulative experiments below). Of the  
249 turtles captured, 44 individuals (46%) were captured inside fenced wetlands, predominately *E.*  
250 *s. worrelli* (32, 34%), and most caught in the upper catchment (Table 1), while the remaining

251 50 individuals were caught in unfenced wetlands in the lower catchment (*C. rugosa*). The  
252 remaining turtles (35) were smaller than 150mm and would be able to pass through fences.

253

### 254 **3.2 Fence manipulative experiments**

#### 255 *Experiment 1 – mesh sizes*

256 Sixty-five turtles (n=33 through small meshing; n=32 through large meshing) were used in this  
257 feral pig fencing experiment (Table 2). When deployed with the small size mesh closest to the  
258 ground, 78.6% (26/33) of turtles were able to pass through without becoming stuck. In  
259 contrast, nearly all turtles (98.6%; 31/32) were able to pass through the pig fences with the  
260 large square meshing on the bottom. Surprisingly, we also observed that even large turtles  
261 (with carapace widths wider than the meshing) were often able to escape through the fencing  
262 by lifting one side of their shell and passing through the mesh diagonally (Figure 1E). This is  
263 the first evidence to suggest that the primary limiting dimension of the fence meshing is the  
264 diagonal width, rather than a horizontal width, as suggested by the field data which was unable  
265 to indicate whether we could not say if those individuals would pass through fences or not.

266

#### 267 *Experiment 2 – installing gates*

268 Turtles located gates after prospecting and trying to fit through meshing areas that were too  
269 small to pass through. The majority (92.1%, 35/38) of turtles was able to locate and pass  
270 through gates, regardless of their spacing, while 7.9% (3/38 turtles) failed to locate a gate  
271 within 2 hours (Table 3). For the three turtles that did not use gates, each appeared to have  
272 ceased attempts to pass through the mesh, dug into the grass, and remained motionless for the  
273 remainder of the trial. Gates applied every 4m showed an 83.3% passage rate (10/12 turtles),  
274 every 2m showed a 91.6% (11/12 turtles) passage rate, and turtle gates applied every 1 m  
275 showed a 100% passage rate (14/14 turtles). Turtles that used the gates spent less time

276 searching for a passage through the fence when gates were closer together, with increased time  
277 searching with increasing distance between gates (Table 3).

278

#### 279 **4. Discussion**

280 Combing field and manipulative experiments, we reveal that most large turtles, which would  
281 not fit through existing pig fence designs, will prospect and move along a barrier fence until  
282 they find suitable passage. By applying gates every 1–4m can allow for nearly 100% passage  
283 rates of turtles that would otherwise be stuck on one side of the fence. Gates may be  
284 strategically applied in travel corridors [46] to minimize the need for large-scale clipping  
285 efforts around entire wetlands (see Figure 3) and would minimize the negative impacts on  
286 turtles by lowering energetic expenditure searching for a gate and reducing exposure to  
287 predation, overheating, and desiccation. Although untested, it is possible that installation of  
288 multiple gates may reduce the structural integrity of pig fences and result in breaches at weak  
289 points.

290

291 While the installation of fences to exclude pigs from wetlands and the periodic culling of pigs  
292 remain common management strategies [22], our field study shows that fences can be  
293 detrimental for turtle populations. However this can be now overcome by incorporating gate  
294 modifications to fences to better assist freshwater turtles that have a shell width greater than the  
295 dimensions of the fencing wire would enhance their conservation. The data here shows that  
296 turtles, regardless of species, with a shell width greater than the diagonal wire gap will likely  
297 be trapped inside (or outside) fenced wetlands, limiting their access to important resources. The  
298 dilemma of reduced availability of freshwater turtle habitat can be mitigated by the simple and  
299 inexpensive design modification outline here, with turtles able to locate the gates and pass  
300 through them in a relatively short period.

301  
302 Tropical wetlands can dry completely especially when they are not close to main river channels  
303 or permanent lagoons [26]. The rate of drying is dependent on antecedent wet season total  
304 rainfall, and the duration and frequency of floodplain connection [16]. Therefore in wet years  
305 the presence of water remaining in fenced wetlands is more likely after the onset of the wet  
306 season, which may for some species (Table S4) prohibit turtle overland dispersal to more  
307 permanent water. The wet season rainfall immediately prior, and during this survey, was within  
308 the 10<sup>th</sup> percentile for historical records, which resulted in some wetlands drying out, requiring  
309 turtles to leave. In both cases, turtles are exposed to predation, either through pigs actively  
310 digging them up underground in unfenced wetlands (which was observed in this study), or  
311 during overland migration (by goannas, some bird species, wild dogs or pigs which are all  
312 predators of turtles).

313  
314 Once erected, fence maintenance is imperative, particularly after bushfire, storm damage, or  
315 flooding that cause damage and compromise fences [47, 48]. Even after installing gates,  
316 surveys should continue to ensure that turtle movement throughout the landscape is not  
317 impeded by fences. Motion triggered cameras and passive transponder trackers [49] could be  
318 installed at gates while routine inspections along fences (as part of general maintenance)  
319 ensuring that gates are in the most effective location. Further modifications could be  
320 administered retrospectively after gates are installed.

321  
322 The size separation in turtles between floodplain wetlands low in the catchment and riverine  
323 wetlands higher in the catchment was unexpected. This highlights important underlying  
324 differences in environmental conditions or food limitation contributing to turtle growth in the  
325 upper catchment remaining smaller compared to those on the expansive floodplain areas. This  
326 highlights the need to undertake extensive baseline surveys to understand local species

327 morphology, as the inclusion of gate designs in wetland fences, even though inexpensive,  
328 might not be always necessary – which has the advantage of protecting fence integrity.

329

## 330 **5. Conclusions**

331 Each conservation fence program requires a scientific monitoring package to evaluate the  
332 efficacy, but more importantly to identify whether additional design improvements are  
333 necessary. We advocate here that an easy management response is to ensure the wider diagonal  
334 width squares are located along the ground when erecting fences, rather than the small diagonal  
335 width squares. This simple tactic increases the number of turtles that could pass through the  
336 fence without delay, and would conceivably not decrease the structural integrity of the fences  
337 to withstand pig prospecting. However, simply removing a small piece of wire to increase  
338 openings allows for nearly 100% passage rates of turtles that would otherwise be stuck on one  
339 side of the fence. Turtle gates may be strategically applied in travel corridors to minimize the  
340 need for large-scale clipping efforts around entire wetlands. Further, gates can be easily  
341 retrofitted to existing fence designs, which has enormous positive conservation benefits for  
342 turtles in an already challenging, and changing floodplain environment.

343

## 344 **Acknowledgements**

345 This project builds on a long-term feral animal management and monitoring program  
346 developed by Kalan enterprises and Aak Puul Ngangtam (APN) and their partners. Kalan and  
347 APN have developed their feral animal research and management agenda to meet the  
348 objectives of traditional owners in the region and have invited science organisations (CSIRO,  
349 James Cook University and the Department of Science and Environment) to contribute to the  
350 outcomes. APN and Kalan have conducted systematic feral pig control and monitoring in the  
351 Archer River basin for the past 6yrs. This study is supported by the Australian Government  
352 National Environment Science Program (Northern Australian Hub) awarded to CSIRO, James

353 Cook University, and the Queensland Government. Capture of turtles and gate exclusion  
354 experiments were conducted under JCU ethics approval A2359.

355

## 356 **References**

- 357 1. Woodroffe R, Hedges S, Durant SM. To fence or not to fence. *Science*.  
358 2014;344(6179):46-8.
- 359 2. Durant SM, Becker MS, Creel S, Bashir S, Dickman AJ, Beudels-Jamar RC, et al.  
360 Developing fencing policies for dryland ecosystems. *Journal of Applied Ecology*.  
361 2015;52(3):544-51.
- 362 3. Loarie SR, Van Aarde RJ, Pimm SL. Fences and artificial water affect African  
363 savannah elephant movement patterns. *Biological conservation*. 2009;142(12):3086-98.
- 364 4. Rey A, Novaro AJ, Guichón ML. Guanaco (*Lama guanicoe*) mortality by entanglement  
365 in wire fences. *Journal for Nature Conservation*. 2012;20(5):280-3.
- 366 5. Ferronato BO, Roe JH, Georges A. Reptile bycatch in a pest-exclusion fence  
367 established for wildlife reintroductions. *Journal for Nature Conservation*. 2014;22(6):577-85.
- 368 6. Jakes AF, Jones PF, Paige LC, Seidler RG, Huijser MP. A fence runs through it: A call  
369 for greater attention to the influence of fences on wildlife and ecosystems. *Biological*  
370 *Conservation*. 2018;227:310-8.
- 371 7. Spencer R-J. Experimentally testing nest site selection: fitness trade-offs and predation  
372 risk in turtles. *Ecology*. 2002;83(8):2136-44.
- 373 8. Jiang T-t, Pan J-f, Pu X-M, Wang B, Pan J-J. Current status of coastal wetlands in  
374 China: degradation, restoration, and future management. *Estuarine, Coastal and Shelf Science*.  
375 2015;164:265-75.
- 376 9. Shumilova O, Zak D, Datry T, von Schiller D, Corti R, Foulquier A, et al. Simulating  
377 rewetting events in intermittent rivers and ephemeral streams: a global analysis of leached  
378 nutrients and organic matter. *Global change biology*. 2019;25(5):1591-611.
- 379 10. Datry T, Foulquier A, Corti R, Von Schiller D, Tockner K, Mendoza-Lera C, et al. A  
380 global analysis of terrestrial plant litter dynamics in non-perennial waterways. *Nature*  
381 *Geoscience*. 2018;11(7):497-503.
- 382 11. Arrington DA, Winemiller KO. Habitat affinity, the seasonal flood pulse, and  
383 community assembly in the littoral zone of a Neotropical floodplain river. *Journal of the North*  
384 *American Benthological Society*. 2006;25(1):126-41.
- 385 12. Pander J, Mueller M, Geist J. Habitat diversity and connectivity govern the  
386 conservation value of restored aquatic floodplain habitats. *Biological Conservation*.  
387 2018;217:1-10.
- 388 13. Galib SM, Lucas MC, Chaki N, Fahad FH, Mohsin A. Is current floodplain  
389 management a cause for concern for fish and bird conservation in Bangladesh's largest  
390 wetland? *Aquatic Conservation: Marine and Freshwater Ecosystems*. 2018;28(1):98-114.
- 391 14. Hurd LE, Sousa RG, Siqueira-Souza FK, Cooper GJ, Kahn JR, Freitas CE. Amazon  
392 floodplain fish communities: Habitat connectivity and conservation in a rapidly deteriorating  
393 environment. *Biological Conservation*. 2016;195:118-27.
- 394 15. Godfrey PC, Arthington AH, Pearson RG, Karim F, Wallace J. Fish larvae and  
395 recruitment patterns in floodplain lagoons of the Australian Wet Tropics. *Marine and*  
396 *Freshwater Research*. 2016.

- 397 16. Wallace J, Waltham NJ, Burrows DW, McJannet D. The temperature regimes of dry-  
398 season waterholes in tropical northern Australia: potential effects on fish refugia. *Freshwater*  
399 *Science*. 2015;34(2):663-78.
- 400 17. Waltham NJ, Coleman L, Buelow C, Fry S, Burrows D. Restoring fish habitat values  
401 on a tropical agricultural floodplain: Learning from two decades of aquatic invasive plant  
402 maintenance efforts. *Ocean & Coastal Management*. 2020;198:105355.
- 403 18. Jardine TD, Kidd KA, Rasmussen JB. Aquatic and terrestrial organic matter in the diet  
404 of stream consumers: implications for mercury bioaccumulation. *Ecological Applications*.  
405 2012;22(3):843-55.
- 406 19. Waltham NJ, Elliott M, Lee SY, Lovelock C, Duarte CM, Buelow C, et al. UN Decade  
407 on Ecosystem of Restoration 2021-2030 – what chance for success in restoring coastal  
408 ecosystems? *Frontiers in Marine Science*. 2020.
- 409 20. Waltham NJ, Burrows D, Wegscheidl C, Buelow C, Ronan M, Connolly N, et al. Lost  
410 floodplain wetland environments and efforts to restore connectivity, habitat and water quality  
411 settings on the Great Barrier Reef. *Frontiers in Marine Science*. 2019;6:71.
- 412 21. Weinstein MP, Litvin SY. Macro-restoration of tidal wetlands: a whole estuary  
413 approach. *Ecological Restoration*. 2016;34(1):27-38.
- 414 22. Fordham DA, Georges A, Brook BW. Indigenous harvest, exotic pig predation and  
415 local persistence of a long-lived vertebrate: managing a tropical freshwater turtle for  
416 sustainability and conservation. *Journal of applied ecology*. 2008;45(1):52-62.
- 417 23. Krull CR, Choquenot D, Burns BR, Stanley MC. Feral pigs in a temperate rainforest  
418 ecosystem: disturbance and ecological impacts. *Biological invasions*. 2013;15(10):2193-204.
- 419 24. Ballari SA, Barrios-García MN. A review of wild boar *Sus scrofa* diet and factors  
420 affecting food selection in native and introduced ranges. *Mammal Review*. 2014;44(2):124-34.
- 421 25. Doupe RG, Mitchell J, Knott MJ, Davis AM, Lymbery AJ. Efficacy of exclusion  
422 fencing to protect ephemeral floodplain lagoon habitats from feral pigs (*Sus scrofa*). *Wetlands*  
423 *Ecology and Management*. 2010;18(1):69-78.
- 424 26. Waltham NJ, Schaffer JR. Thermal and asphyxia exposure risk to freshwater fish in  
425 feral-pig-damaged tropical wetlands. *Journal of Fish Biology*. 2018;93(4):723-8.
- 426 27. Doupe RG, Schaffer J, Knott MJ, Dicky PW. A description of freshwater turtle habitat  
427 destruction by feral pigs in tropical north eastern Australia. *Herpetological Conservation and*  
428 *Biology*. 2009;4:331-9.
- 429 28. Mitchell J, Mayer R. Diggings by feral pigs within the Wet Tropics World Heritage  
430 Area of north Queensland. *Wildlife Research*. 1997;24(5):591-601.
- 431 29. Steward AL, Negus P, Marshall JC, Clifford SE, Dent C. Assessing the ecological  
432 health of rivers when they are dry. *Ecological Indicators*. 2018;85:537-47.
- 433 30. Fordham D, Georges A, Corey B, Brook BW. Feral pig predation threatens the  
434 indigenous harvest and local persistence of snake-necked turtles in northern Australia.  
435 *Biological Conservation*. 2006;133(3):379-88.
- 436 31. Ens E, Bentley-Toon S, Champion F, Champion S, Kelly J, Towler G. Rapid appraisal  
437 links feral buffalo with kunkod (*Melaleuca* spp.) decline in freshwater billabongs of tropical  
438 northern Australia. *Marine and Freshwater Research*. 2017;68(9):1642-52.
- 439 32. Ross B, Waltham NJ, Schaffer J, Jaffer T, Whyte S, Perry J, et al. Improving  
440 biodiversity outcomes and carbon reduction through feral pig abatement. Cairns: Balkanu Cape  
441 York Development Corporation Ltd Pty, 2017.
- 442 33. Nordberg EJ, Macdonald S, Zimny G, Hoskins A, Zimny A, Somaweera R, et al. An  
443 evaluation of nest predator impacts and the efficacy of plastic meshing on marine turtle nests  
444 on the western Cape York Peninsula, Australia. *Biological Conservation*. 2019;238:108201.
- 445 34. Browne CL, Hecnar SJ. Species loss and shifting population structure of freshwater  
446 turtles despite habitat protection. *Biological Conservation*. 2007;138(3-4):421-9.



- 447 35. Doody JS, Green B, Sims R, Rhind D, West P, Steer D. Indirect impacts of invasive  
448 cane toads (*Bufo marinus*) on nest predation in pig nosed turtles (*Carettochelys insculpta*).  
449 Wildlife Research. 2006;33(5):349-54.
- 450 36. Micheli-Campbell MA, Connell MJ, Dwyer RG, Franklin CE, Fry B, Kennard MJ, et  
451 al. Identifying critical habitat for freshwater turtles: integrating long-term monitoring tools to  
452 enhance conservation and management. Biodiversity and Conservation. 2017;26(7):1675-88.
- 453 37. Fordham DA, Shoemaker KT, Schumaker NH, Akçakaya HR, Clisby N, Brook BW.  
454 How interactions between animal movement and landscape processes modify local range  
455 dynamics and extinction risk. Biology letters. 2014;10(5):20140198.
- 456 38. Georges A. Thermal-Characteristics and Sex Determination in Field Nests of the Pig-  
457 Nosed Turtle, *Carettochelys-Insculpta* (Chelonia, *Carettochelydidae*), From Northern Australia.  
458 Australian Journal of Zoology. 1992;40(5):511-21.
- 459 39. Gibbs JP, Shriver WG. Estimating the effects of road mortality on turtle populations.  
460 Conservation Biology. 2002;16(6):1647-52.
- 461 40. Hamer AJ, Harrison LJ, Stokeld D. Road density and wetland context alter population  
462 structure of a freshwater turtle. Austral ecology. 2016;41(1):53-64.
- 463 41. Gongora J, Fleming P, Spencer PB, Mason R, Garkavenko O, Meyer J-N, et al.  
464 Phylogenetic relationships of Australian and New Zealand feral pigs assessed by mitochondrial  
465 control region sequence and nuclear GPIP genotype. Molecular Phylogenetics and Evolution.  
466 2004;33(2):339-48.
- 467 42. Lopez J, Hurwood D, Dryden B, Fuller S. Feral pig populations are structured at fine  
468 spatial scales in tropical Queensland, Australia. PloS one. 2014;9(3):e91657.
- 469 43. Hamann M, Schauble CS, Emerick SP, Limpus DJ, Limpus CJ. Freshwater turtle  
470 populations in the Burnett River. Memoirs of the Queensland Museum. 2008;52:221-32.
- 471 44. Clarke KR. Non-parametric multivariate analyses of changes in community structure.  
472 Australian Journal of Ecology. 1993;18:117-43.
- 473 45. Anderson MJ. A new method for non-parametric multivariate analysis of variance.  
474 Australian Journal of Ecology. 2001;26:32-46.
- 475 46. Roe JH, Georges A. Maintenance of variable responses for coping with wetland drying  
476 in freshwater turtles. Ecology. 2008;89(2):485-94.
- 477 47. Kesch MK, Bauer DT, Loveridge AJ. Break on through to the other side: the  
478 effectiveness of game fencing to mitigate human—wildlife conflict. African Journal of  
479 Wildlife Research. 2015;45(1):76-88.
- 480 48. Negus PM, Marshall JC, Clifford SE, Blessing JJ, Steward AL. No sitting on the fence:  
481 protecting wetlands from feral pig damage by exclusion fences requires effective fence  
482 maintenance. Wetlands Ecology and Management. 2019:1-5.
- 483 49. Soanes K, Vesk PA, van der Ree R. Monitoring the use of road-crossing structures by  
484 arboreal marsupials: insights gained from motion-triggered cameras and passive integrated  
485 transponder (PIT) tags. Wildlife Research. 2015;42(3):241-56.

486

487 **Table 1.** Summary of turtles captured in fenced and unfenced wetlands on the lower  
488 floodplain and upper catchment flood areas. *C. canni* not included here given turtles were  
489 found on road crossings, not in wetlands.  
490

| Species               | Location        | n  | Unfenced   |            | Fence      |            |
|-----------------------|-----------------|----|------------|------------|------------|------------|
|                       |                 |    | <150mm SCW | >150mm SCW | <150mm SCW | >150mm SCW |
| <i>C. rugosa</i>      | Lower catchment | 39 | 12         | 23         | 0          | 4          |
|                       | Upper catchment | 15 | 3          | 11         | 0          | 1          |
| <i>E. s. worrelli</i> | Lower catchment | 6  | 0          | 0          | 0          | 6          |
|                       | Upper catchment | 90 | 0          | 1          | 23         | 66         |
| <i>M. latisternum</i> | Lower catchment | 0  | 0          | 0          | 0          | 0          |
|                       | Upper catchment | 6  | 1          | 4          | 0          | 1          |

491

492

493 **Table 2.** Size distribution of turtles from experiment 1 – passage rates through feral pig fencing. Turtles were either blocked or escaped (see  
 494 Figure 1E). Fence mesh size represents the size mesh at the bottom of the fence, closest to the ground (large = 150x150mm; small =  
 495 150x100mm). SCW = straight carapace width; SCL = straight carapace length; carapace height = max height from plastron to carapace. Range  
 496 represents minimum – maximum.  
 497

| Fence mesh size | Turtle outcome | n  | Passage rate | SCW          |               | SCL          |               | Carapace height |              |
|-----------------|----------------|----|--------------|--------------|---------------|--------------|---------------|-----------------|--------------|
|                 |                |    |              | Mean±SD (mm) | Range (mm)    | Mean±SD (mm) | Range (mm)    | Mean±SD (mm)    | Range (mm)   |
| Large           | Blocked        | 1  | 3.1%         | 173.6        | 173.6         | 232.7        | 232.7         | 94.4            | 94.4         |
| Large           | Escaped        | 31 | 96.8%        | 166.9 ± 15.0 | 139.5 - 205.8 | 218.3 ± 25.7 | 129.1 - 251.4 | 85.1 ± 10.1     | 59.7 - 101.0 |
| Small           | Blocked        | 7  | 21.2%        | 177.6 ± 6.5  | 170.0 - 187.6 | 234.7 ± 6.5  | 226.0 - 245.0 | 94.4 ± 3.8      | 89.7 - 100.2 |
| Small           | Escaped        | 26 | 78.7%        | 161.4 ± 13.9 | 121.4 - 184.5 | 210.8 ± 20.6 | 154.8 - 247.7 | 82.5 ± 9.5      | 63.2 - 100.0 |

498

499 **Table 3.** Passage rates of 38 turtles in experiment 2 – testing if turtles locate and use ‘turtle gates’. ‘Fence to escape’ represents the time turtles  
 500 took to locate and use the turtle gate once they reached a fence. ‘Distance travelled’ represents the distance travelled once a turtle encountered a  
 501 fence until it located a turtle gate, or the 2-hour time-cap elapsed.  
 502

| Turtle gate spacing (m) | Turtle outcome | n  | Passage rate | Fence to escape (min) |       | Distance travelled (m) |         |
|-------------------------|----------------|----|--------------|-----------------------|-------|------------------------|---------|
|                         |                |    |              | Mean±SD               | Range | Mean±SD                | Range   |
| 1                       | Used gate      | 14 | 100.0%       | 3.7±8.5               | 0-33  | 2.0±1.5                | 0.1-4.6 |
| 1                       | Blocked        | 0  | 0.0%         | -                     | -     | -                      | -       |
| 2                       | Used gate      | 11 | 91.6%        | 6.3±12.7              | 0-43  | 1.9±2.2                | 0-6.3   |
| 2                       | Blocked        | 1  | 8.4%         | 88                    | 88    | 6.5                    | 6.5     |
| 4                       | Used gate      | 10 | 83.3%        | 8.8±10.6              | 0-36  | 2.1±1.6                | 0-4.5   |
| 4                       | Blocked        | 2  | 16.7%        | 90.0±12.7             | 81-99 | 2.2±0.7                | 1.7-2.8 |

503

1 **List of Figures**

2 Fig 1. A) location of the Archer River catchment in northern Queensland, Australia; B) wetland  
3 sites on the coastal floodplain and mid catchment where feral pig fencing has been completed  
4 around wetlands preventing access (yellow circles); C) fenced wetland preventing pig access to  
5 coastal wetland (photo source S Jackson, Queensland Parks and Wildlife Services); D)  
6 Experiment 1 showing location of four arenas used to manipulate fencing gate design and turtle  
7 blockage/escaped; E) example of turtle blocked by fencing and escaped through fencing by  
8 angling body position, and F) Experiment 2 showing how gate opening was manipulated to test  
9 improvements to fencing design and allowing turtles to pass through fences.

10  
11 Fig 2. nMDS ordination of all individual turtles captured in the Archer River catchment during  
12 field surveys. Black boxes are turtles on the floodplain, grey circles are turtles from upper  
13 catchment – open symbols are fenced, and closed symbols are unfenced wetlands.

14  
15 Fig 3. A) floodplain wetland complex following wet season and connection; B) floodplain late  
16 dry season with drying wetlands and impact of feral pigs, red dashed line illustrates where  
17 gates should be installed to maximise turtle escape and return to primary river.

18

bioRxiv preprint doi: <https://doi.org/10.1101/2020.12.03.409607>; this version posted December 3, 2020. The copyright holder for this preprint (which was not certified by peer review) is the author/funder, who has granted bioRxiv a license to display the preprint in perpetuity. It is made available under aCC-BY 4.0 International license.

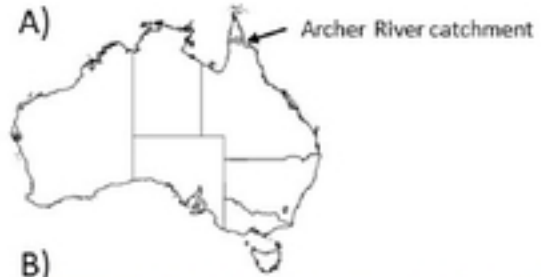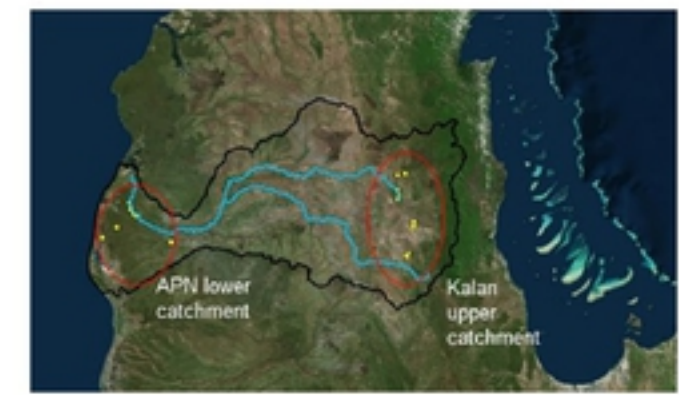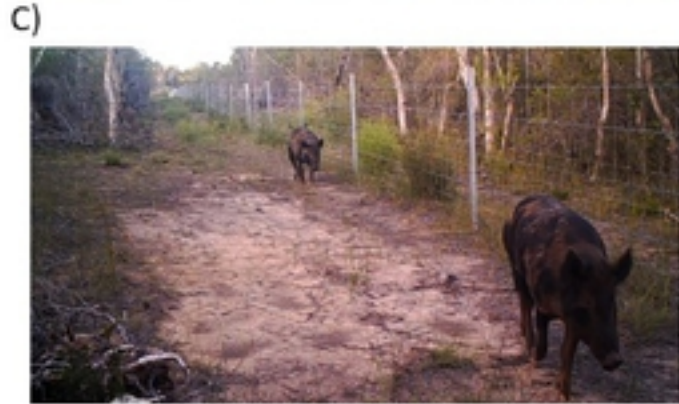

D) Experiment 1

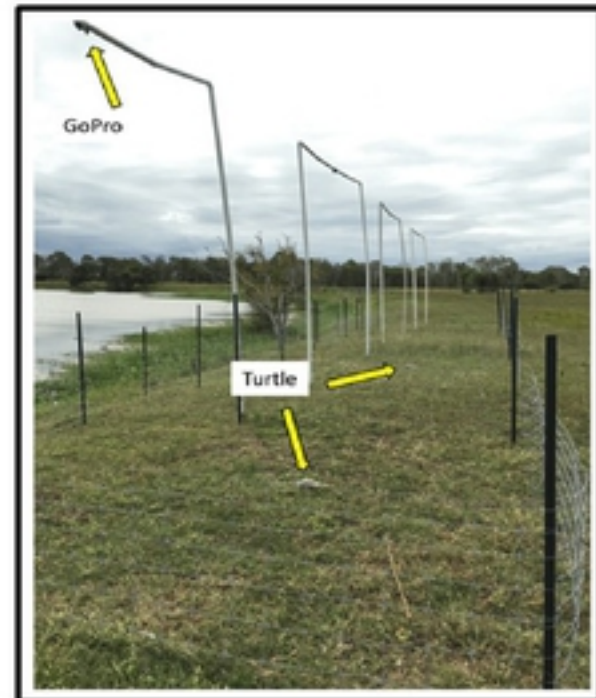

F) Experiment 2

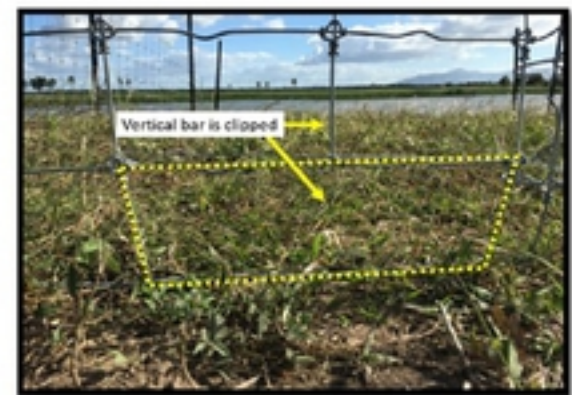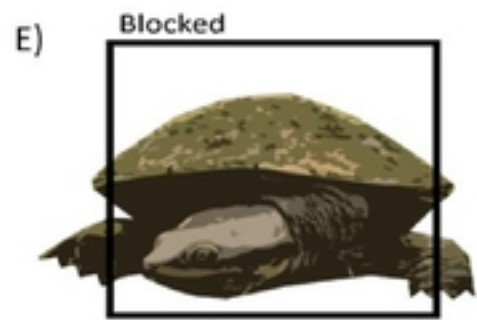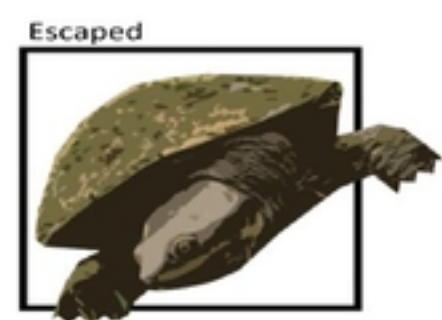

Fig 1.

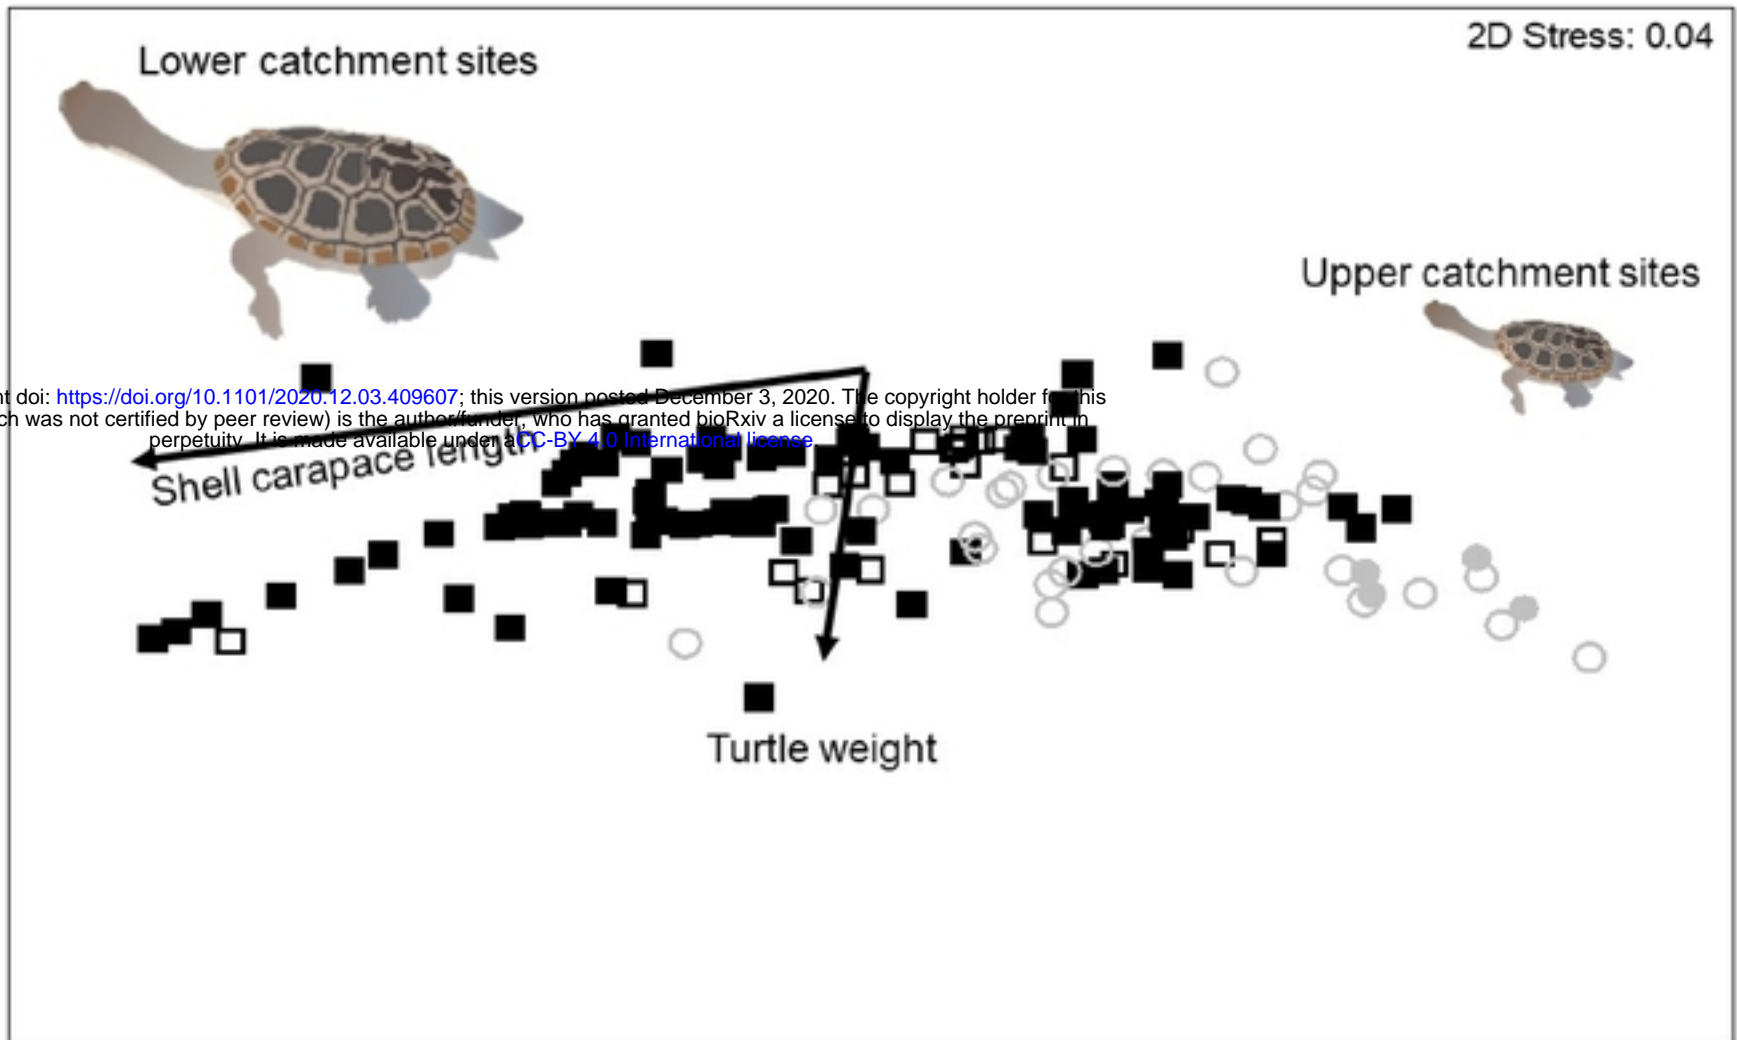

Fig 2

### A) Post wet season

bioRxiv preprint doi: <https://doi.org/10.1101/2020.12.03.409607>; this version posted December 3, 2020. The copyright holder for this preprint (which was not certified by peer review) is the author/funder, who has granted bioRxiv a license to display the preprint in perpetuity. It is made available under a [CC-BY 4.0 International license](#).

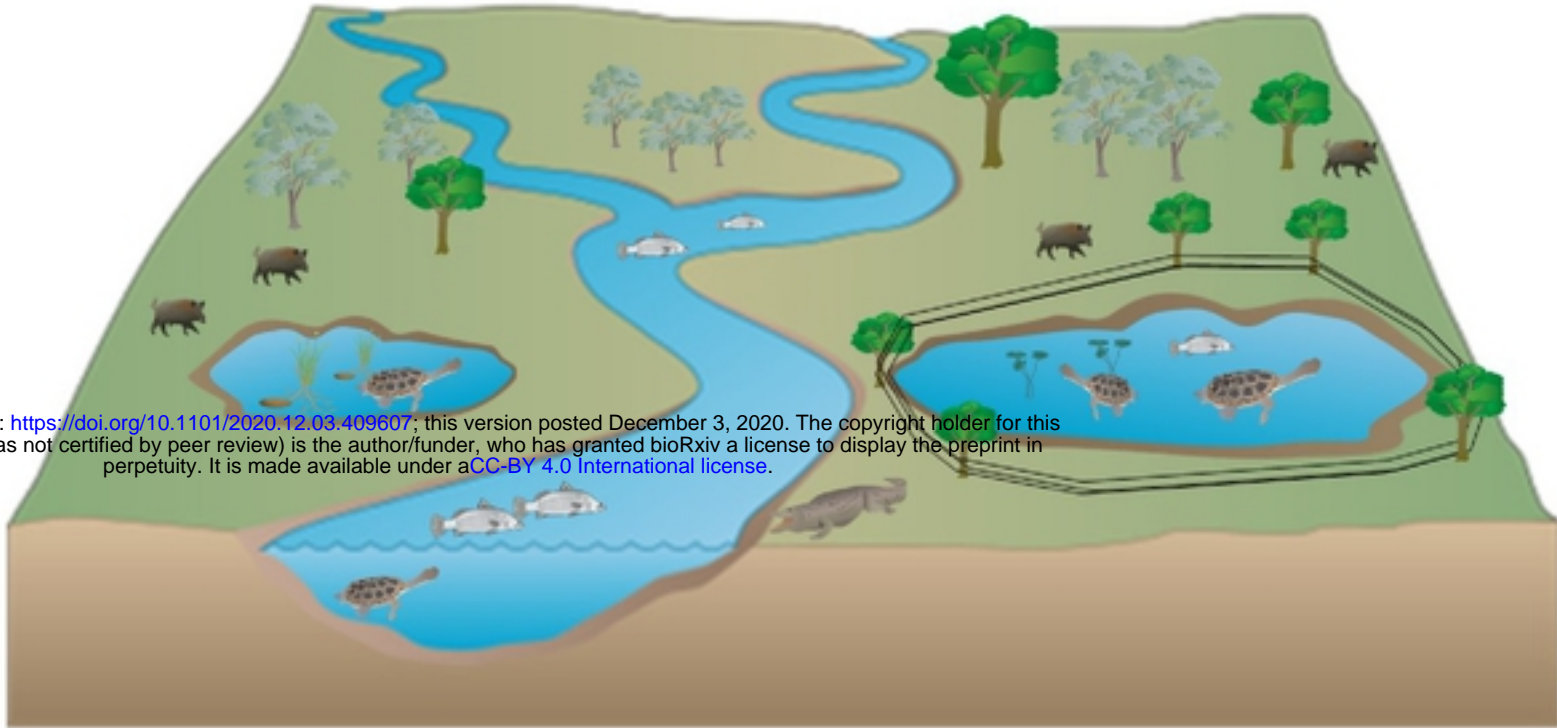

### B) Dry season

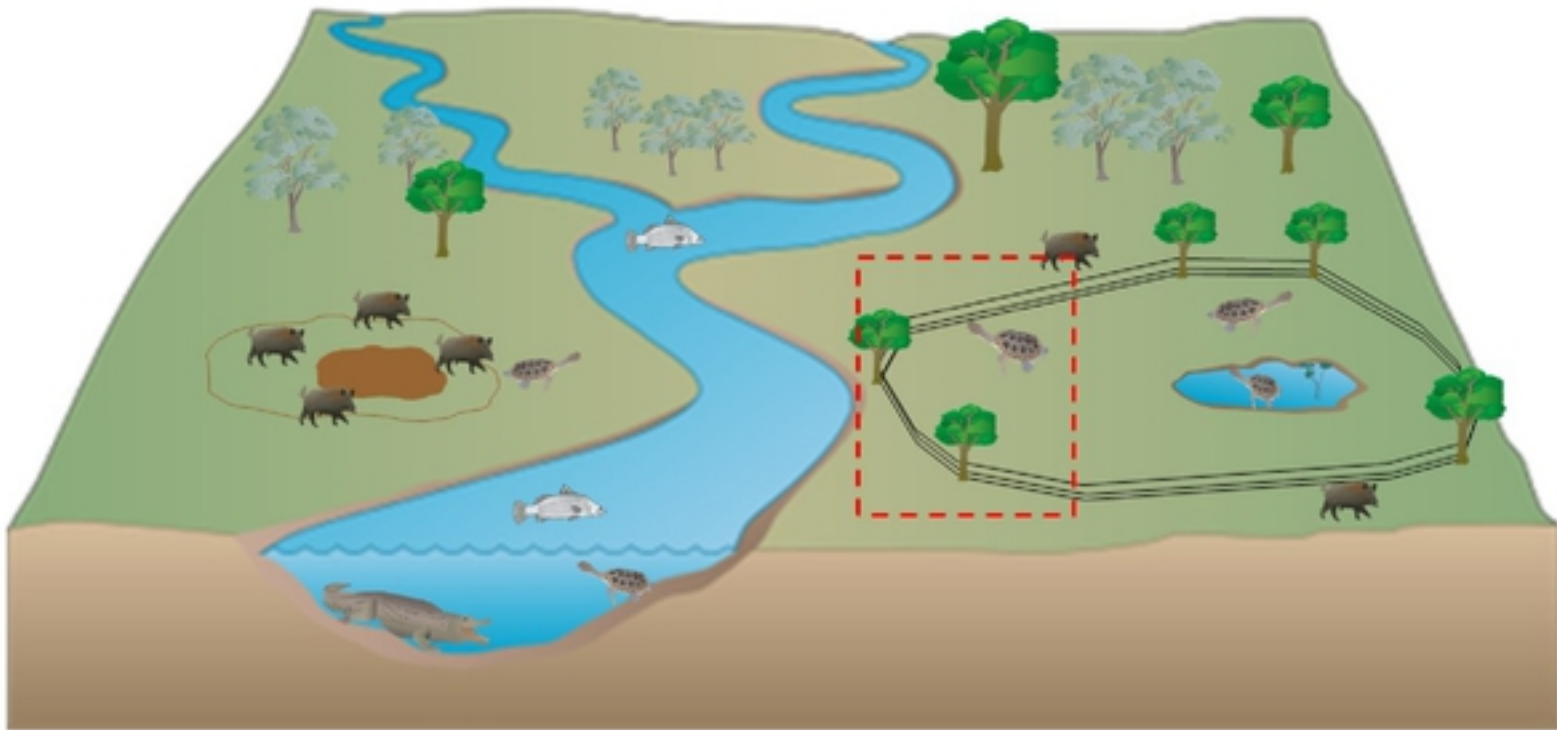

Fig 3.
